# Supplementary material
Source: PubMed Central journal article supplement (PMC2590718)
Supplement: tpc.107.056341_1.pdf [file tpc.107.056341_1.pdf]

Supplemental Data Schippers et al. (2008) The *Arabidopsis* onset of leaf death 5 mutation of quinolinate synthase affects NAD biosynthesis and causes early ageing.

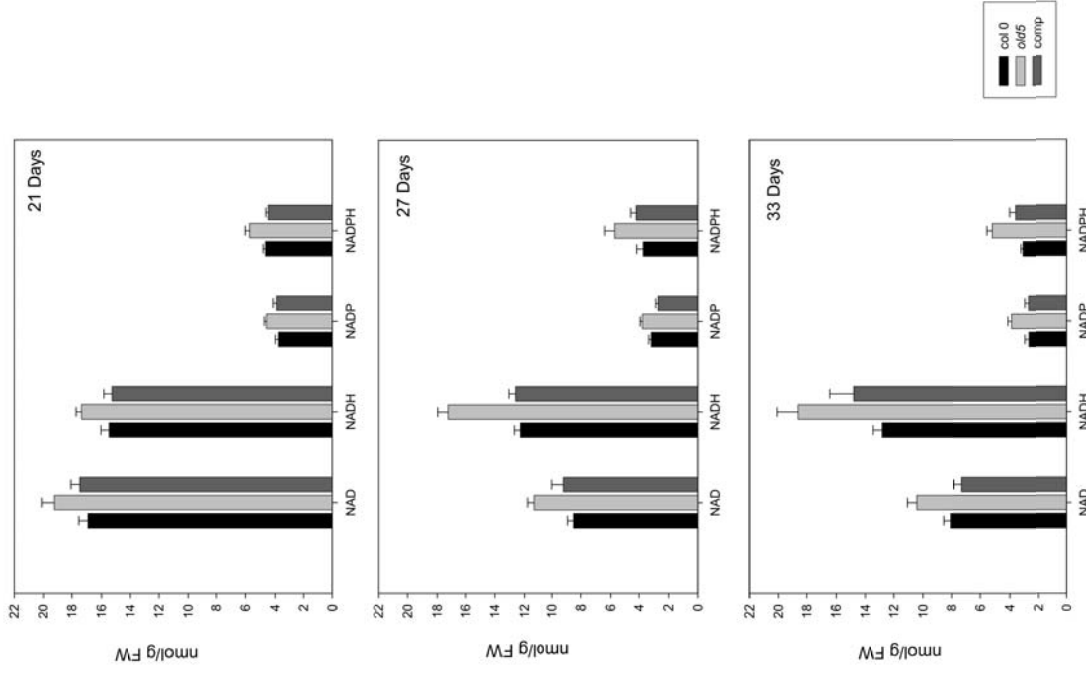

**Supplemental Figure 1:**

Complementation of the *old5* mutation reverses the increased pyridine nucleotide content. (A) Pyridine nucleotide content in *old5* and wild type at day 21, day 27 and day 33 (*old5* gray bars, wild type solid black bars, complemented line dark grey). The values shown are the means of six repeats  $\pm$  SD (indicated by error bars).

**Supplemental table 1.** Metabolite levels in the first leaf pair of 21 and 27

day old plants of *old5* relative to wild type. Leaves were harvested 5h into the photoperiod and irrespective of the method of analysis. Values presented are the mean of relative values  $\pm$  standard error of 6 measurements per genotype.

| Metabolites             | WT 21 days      | Old5 21 days    | WT 27 days      | OLD5 27 days    | WT 27/21        | OLD5 27/21             |
|-------------------------|-----------------|-----------------|-----------------|-----------------|-----------------|------------------------|
| <b>Amino acids</b>      |                 |                 |                 |                 |                 |                        |
| Alanine                 | 1.00 $\pm$ 0.08 | 1.15 $\pm$ 0.19 | 1.00 $\pm$ 0.20 | 1.32 $\pm$ 0.26 | 0.67 $\pm$ 0.13 | <b>0.77</b> $\pm$ 0.15 |
| Asparagine              | 1.00 $\pm$ 0.16 | 1.51 $\pm$ 0.13 | 1.00 $\pm$ 0.10 | 2.39 $\pm$ 0.21 | 0.40 $\pm$ 0.04 | 0.63 $\pm$ 0.05        |
| Aspartic acid           | 1.00 $\pm$ 0.14 | 1.36 $\pm$ 0.05 | 1.00 $\pm$ 0.09 | 1.89 $\pm$ 0.36 | 0.81 $\pm$ 0.07 | 1.12 $\pm$ 0.21        |
| $\beta$ -Alanine        | 1.00 $\pm$ 0.12 | 0.95 $\pm$ 0.07 | 1.00 $\pm$ 0.09 | 4.30 $\pm$ 0.27 | 0.56 $\pm$ 0.05 | 2.55 $\pm$ 0.16        |
| Cysteine                | 1.00 $\pm$ 0.06 | 1.04 $\pm$ 0.07 | 1.00 $\pm$ 0.06 | 1.27 $\pm$ 0.14 | 0.90 $\pm$ 0.05 | 1.10 $\pm$ 0.12        |
| GABA                    | 1.00 $\pm$ 0.06 | 1.01 $\pm$ 0.05 | 1.00 $\pm$ 0.08 | 2.95 $\pm$ 0.40 | 1.07 $\pm$ 0.08 | <b>3.14</b> $\pm$ 0.43 |
| Glutamate               | 1.00 $\pm$ 0.07 | 2.25 $\pm$ 0.26 | 1.00 $\pm$ 0.10 | 1.95 $\pm$ 0.20 | 0.62 $\pm$ 0.06 | <b>0.54</b> $\pm$ 0.05 |
| Glutamine               | 1.00 $\pm$ 0.06 | 1.43 $\pm$ 0.09 | 1.00 $\pm$ 0.06 | 1.65 $\pm$ 0.22 | 0.46 $\pm$ 0.03 | 0.53 $\pm$ 0.07        |
| Glycine                 | 1.00 $\pm$ 0.10 | 0.74 $\pm$ 0.18 | 1.00 $\pm$ 0.16 | 0.61 $\pm$ 0.05 | 0.54 $\pm$ 0.08 | <b>0.44</b> $\pm$ 0.03 |
| Homoserine              | 1.00 $\pm$ 0.04 | 0.91 $\pm$ 0.04 | 1.00 $\pm$ 0.05 | 1.26 $\pm$ 0.17 | 0.88 $\pm$ 0.05 | 1.23 $\pm$ 0.17        |
| Isoleucine              | 1.00 $\pm$ 0.06 | 0.93 $\pm$ 0.03 | 1.00 $\pm$ 0.08 | 1.50 $\pm$ 0.14 | 0.87 $\pm$ 0.07 | <b>1.41</b> $\pm$ 0.13 |
| Lysine                  | 1.00 $\pm$ 0.33 | 0.61 $\pm$ 0.04 | 1.00 $\pm$ 0.33 | 1.51 $\pm$ 0.10 | 0.65 $\pm$ 0.22 | <b>1.60</b> $\pm$ 0.11 |
| Methionine              | 1.00 $\pm$ 0.03 | 1.25 $\pm$ 0.15 | 1.00 $\pm$ 0.37 | 1.04 $\pm$ 0.09 | 0.87 $\pm$ 0.33 | 0.73 $\pm$ 0.06        |
| O-acetyl-serine         | 1.00 $\pm$ 0.06 | 0.89 $\pm$ 0.04 | 1.00 $\pm$ 0.07 | 1.18 $\pm$ 0.16 | 0.93 $\pm$ 0.07 | 1.25 $\pm$ 0.17        |
| Ornithine               | 1.00 $\pm$ 0.19 | 1.46 $\pm$ 0.17 | 1.00 $\pm$ 0.15 | 1.66 $\pm$ 0.12 | 0.65 $\pm$ 0.10 | <b>0.74</b> $\pm$ 0.06 |
| Phenylalanine           | 1.00 $\pm$ 0.08 | 1.23 $\pm$ 0.08 | 1.00 $\pm$ 0.16 | 3.97 $\pm$ 0.48 | 0.60 $\pm$ 0.09 | <b>1.95</b> $\pm$ 0.23 |
| Proline                 | 1.00 $\pm$ 0.06 | 1.73 $\pm$ 0.17 | 1.00 $\pm$ 0.10 | 2.03 $\pm$ 0.32 | 0.73 $\pm$ 0.07 | <b>0.85</b> $\pm$ 0.13 |
| Putrescine              | 1.00 $\pm$ 0.07 | 0.93 $\pm$ 0.04 | 1.00 $\pm$ 0.11 | 2.48 $\pm$ 0.27 | 0.67 $\pm$ 0.07 | 1.77 $\pm$ 0.19        |
| Serine                  | 1.00 $\pm$ 0.12 | 1.69 $\pm$ 0.22 | 1.00 $\pm$ 0.08 | 2.62 $\pm$ 0.65 | 0.50 $\pm$ 0.04 | 0.78 $\pm$ 0.19        |
| Tyrosine                | 1.00 $\pm$ 0.05 | 1.15 $\pm$ 0.06 | 1.00 $\pm$ 0.08 | 1.15 $\pm$ 0.05 | 1.12 $\pm$ 0.09 | 1.12 $\pm$ 0.05        |
| Valine                  | 1.00 $\pm$ 0.07 | 1.14 $\pm$ 0.06 | 1.00 $\pm$ 0.08 | 2.13 $\pm$ 0.15 | 0.62 $\pm$ 0.05 | 1.17 $\pm$ 0.08        |
| <b>Organic acids</b>    |                 |                 |                 |                 |                 |                        |
| $\alpha$ -Ketoglutarate | 1.00 $\pm$ 0.06 | 1.22 $\pm$ 0.10 | 1.00 $\pm$ 0.05 | 1.80 $\pm$ 0.12 | 0.42 $\pm$ 0.02 | 0.62 $\pm$ 0.04        |
| Citrate                 | 1.00 $\pm$ 0.26 | 0.59 $\pm$ 0.13 | 1.00 $\pm$ 0.16 | 0.69 $\pm$ 0.27 | 3.48 $\pm$ 0.57 | 4.07 $\pm$ 1.09        |
| Fumarate                | 1.00 $\pm$ 0.08 | 1.03 $\pm$ 0.09 | 1.00 $\pm$ 0.05 | 1.16 $\pm$ 0.10 | 1.31 $\pm$ 0.06 | <b>1.47</b> $\pm$ 0.13 |
| Glycerate               | 1.00 $\pm$ 0.11 | 0.70 $\pm$ 0.10 | 1.00 $\pm$ 0.10 | 0.54 $\pm$ 0.06 | 0.65 $\pm$ 0.07 | <b>0.50</b> $\pm$ 0.05 |
| Malate                  | 1.00 $\pm$ 0.24 | 1.50 $\pm$ 0.22 | 1.00 $\pm$ 0.06 | 1.54 $\pm$ 0.17 | 2.33 $\pm$ 0.14 | <b>2.39</b> $\pm$ 0.26 |

|                          |             |             |             |             |             |             |
|--------------------------|-------------|-------------|-------------|-------------|-------------|-------------|
| Oxalate                  | 1.00 ± 0.10 | 0.95 ± 0.06 | 1.00 ± 0.09 | 1.53 ± 0.14 | 1.28 ± 0.11 | 2.06 ± 0.19 |
| Phosphorate              | 1.00 ± 0.12 | 1.03 ± 0.10 | 1.00 ± 0.14 | 1.93 ± 0.50 | 0.77 ± 0.11 | 1.44 ± 0.37 |
| Pyruvate                 | 1.00 ± 0.08 | 1.04 ± 0.09 | 1.00 ± 0.12 | 1.37 ± 0.18 | 0.76 ± 0.09 | 1.00 ± 0.13 |
| Saccharate               | 1.00 ± 0.13 | 0.90 ± 0.07 | 1.00 ± 0.09 | 1.22 ± 0.16 | 1.35 ± 0.12 | 1.83 ± 0.24 |
| Succinate                | 1.00 ± 0.04 | 1.19 ± 0.06 | 1.00 ± 0.05 | 3.04 ± 0.27 | 1.34 ± 0.07 | 3.42 ± 0.31 |
| <b>Fatty acids</b>       |             |             |             |             |             |             |
| Nonanoic acid            | 1.00 ± 0.11 | 0.79 ± 0.05 | 1.00 ± 0.07 | 1.14 ± 0.15 | 0.96 ± 0.06 | 1.38 ± 0.18 |
| Stearate                 | 1.00 ± 0.06 | 0.97 ± 0.05 | 1.00 ± 0.07 | 1.15 ± 0.16 | 0.96 ± 0.06 | 1.14 ± 0.16 |
| <b>Sugars</b>            |             |             |             |             |             |             |
| Fructose                 | 1.00 ± 0.05 | 1.01 ± 0.04 | 1.00 ± 0.05 | 1.05 ± 0.10 | 1.09 ± 0.05 | 1.13 ± 0.11 |
| Maltose                  | ND          | ND          | 1.00 ± 0.08 | 2.62 ± 0.09 | ND          | ND          |
| Sucrose                  | 1.00 ± 0.08 | 1.30 ± 0.13 | 1.00 ± 0.13 | 1.59 ± 0.09 | 0.77 ± 0.10 | 0.95 ± 0.05 |
| Threhalose               | 1.00 ± 0.30 | 1.50 ± 0.29 | 1.00 ± 0.16 | 0.90 ± 0.09 | 0.71 ± 0.11 | 0.43 ± 0.05 |
| Xylose                   | 1.00 ± 0.06 | 0.67 ± 0.10 | 1.00 ± 0.11 | 3.22 ± 0.47 | 0.49 ± 0.05 | 2.36 ± 0.34 |
| <b>Sugar alcohols</b>    |             |             |             |             |             |             |
| Erythritol               | 1.00 ± 0.05 | 0.91 ± 0.05 | 1.00 ± 0.05 | 1.03 ± 0.06 | 0.49 ± 0.03 | 0.55 ± 0.03 |
| Galactinol glycerol      | 1.00 ± 0.04 | 1.34 ± 0.08 | 1.00 ± 0.09 | 2.23 ± 0.11 | 0.63 ± 0.06 | 1.04 ± 0.20 |
| Mannitol                 | 1.00 ± 0.10 | 0.81 ± 0.06 | 1.00 ± 0.22 | 0.93 ± 0.06 | 1.06 ± 0.23 | 1.21 ± 0.08 |
| Mannitol                 | 1.00 ± 0.03 | 0.81 ± 0.06 | 1.00 ± 0.06 | 0.83 ± 0.10 | 0.69 ± 0.04 | 0.71 ± 0.13 |
| <b>Other metabolites</b> |             |             |             |             |             |             |
| Guanidine                | 1.00 ± 0.15 | 1.42 ± 0.16 | 1.00 ± 0.09 | 1.69 ± 0.29 | 0.70 ± 0.06 | 0.84 ± 0.14 |
| Spermidine               | 1.00 ± 0.11 | 1.55 ± 0.17 | 1.00 ± 0.11 | 3.08 ± 0.17 | 0.57 ± 0.06 | 1.12 ± 0.06 |

**Supplemental table 2.** Metabolite levels in the first leaf pair of 21, 27 and 33 day old plants of complemented *old5* relative to wild type. Leaves were harvested 5h into the photoperiod and irrespective of the method of analysis. Values presented are the mean of relative values  $\pm$  standard error of 6 measurements per genotype.

| Metabolites          | WT 21 days      |                 | Comp 21 days    |                 | WT 27 days      |                 | Comp 27 days    |                 | WT 33 days      |                 | Comp 33 days    |                 | WT 27/21        |                 | WT 33/21        |                 |
|----------------------|-----------------|-----------------|-----------------|-----------------|-----------------|-----------------|-----------------|-----------------|-----------------|-----------------|-----------------|-----------------|-----------------|-----------------|-----------------|-----------------|
|                      |                 |                 |                 |                 |                 |                 |                 |                 |                 |                 |                 |                 |                 |                 |                 |                 |
| <b>Amino acids</b>   |                 |                 |                 |                 |                 |                 |                 |                 |                 |                 |                 |                 |                 |                 |                 |                 |
| Alanine              | 1.00 $\pm$ 0.10 | 1.02 $\pm$ 0.12 | 1.00 $\pm$ 0.10 | 0.23 $\pm$ 0.87 | 1.00 $\pm$ 0.13 | 0.87 $\pm$ 0.13 | 1.00 $\pm$ 0.15 | 1.14 $\pm$ 0.12 | 1.00 $\pm$ 0.13 | 0.13 $\pm$ 0.12 | 1.00 $\pm$ 0.15 | 1.14 $\pm$ 0.12 | 0.49 $\pm$ 0.10 | 0.23 $\pm$ 0.11 | 0.49 $\pm$ 0.10 | 0.23 $\pm$ 0.11 |
| Aspartic acid        | 1.00 $\pm$ 0.13 | 0.88 $\pm$ 0.14 | 1.00 $\pm$ 0.13 | 0.07 $\pm$ 0.83 | 1.00 $\pm$ 0.12 | 0.83 $\pm$ 0.12 | 1.00 $\pm$ 0.12 | 1.26 $\pm$ 0.19 | 1.00 $\pm$ 0.12 | 0.12 $\pm$ 0.19 | 1.00 $\pm$ 0.12 | 1.26 $\pm$ 0.19 | 0.47 $\pm$ 0.03 | 0.42 $\pm$ 0.05 | 0.47 $\pm$ 0.03 | 0.42 $\pm$ 0.05 |
| $\beta$ -Alanine     | 1.00 $\pm$ 0.04 | 0.96 $\pm$ 0.06 | 1.00 $\pm$ 0.04 | 0.14 $\pm$ 1.03 | 1.00 $\pm$ 0.03 | 1.03 $\pm$ 0.03 | 1.00 $\pm$ 0.06 | 0.96 $\pm$ 0.05 | 1.00 $\pm$ 0.06 | 0.03 $\pm$ 0.05 | 1.00 $\pm$ 0.06 | 0.96 $\pm$ 0.05 | 0.77 $\pm$ 0.10 | 0.90 $\pm$ 0.05 | 0.77 $\pm$ 0.10 | 0.90 $\pm$ 0.05 |
| GABA                 | 1.00 $\pm$ 0.12 | 1.06 $\pm$ 0.06 | 1.00 $\pm$ 0.12 | 0.13 $\pm$ 1.11 | 1.00 $\pm$ 0.04 | 1.11 $\pm$ 0.04 | 1.00 $\pm$ 0.19 | 0.85 $\pm$ 0.09 | 1.00 $\pm$ 0.19 | 0.04 $\pm$ 0.09 | 1.00 $\pm$ 0.19 | 0.85 $\pm$ 0.09 | 0.96 $\pm$ 0.12 | 1.54 $\pm$ 0.28 | 0.96 $\pm$ 0.12 | 1.54 $\pm$ 0.28 |
| Glutamate            | 1.00 $\pm$ 0.13 | 0.78 $\pm$ 0.09 | 1.00 $\pm$ 0.13 | 0.13 $\pm$ 0.92 | 1.00 $\pm$ 0.15 | 0.92 $\pm$ 0.15 | 1.00 $\pm$ 0.20 | 0.88 $\pm$ 0.15 | 1.00 $\pm$ 0.20 | 0.15 $\pm$ 0.15 | 1.00 $\pm$ 0.20 | 0.88 $\pm$ 0.15 | 0.27 $\pm$ 0.04 | 0.15 $\pm$ 0.03 | 0.27 $\pm$ 0.04 | 0.15 $\pm$ 0.03 |
| Glycine              | 1.00 $\pm$ 0.15 | 0.84 $\pm$ 0.06 | 1.00 $\pm$ 0.15 | 0.16 $\pm$ 0.95 | 1.00 $\pm$ 0.15 | 0.95 $\pm$ 0.15 | 1.00 $\pm$ 0.04 | 0.94 $\pm$ 0.09 | 1.00 $\pm$ 0.04 | 0.15 $\pm$ 0.09 | 1.00 $\pm$ 0.04 | 0.94 $\pm$ 0.09 | 0.72 $\pm$ 0.11 | 0.55 $\pm$ 0.02 | 0.72 $\pm$ 0.11 | 0.55 $\pm$ 0.02 |
| Isoleucine           | 1.00 $\pm$ 0.07 | 1.01 $\pm$ 0.09 | 1.00 $\pm$ 0.07 | 0.13 $\pm$ 1.00 | 1.00 $\pm$ 0.06 | 1.00 $\pm$ 0.06 | 1.00 $\pm$ 0.08 | 0.75 $\pm$ 0.04 | 1.00 $\pm$ 0.08 | 0.06 $\pm$ 0.04 | 1.00 $\pm$ 0.08 | 0.75 $\pm$ 0.04 | 1.28 $\pm$ 0.16 | 1.93 $\pm$ 0.16 | 1.28 $\pm$ 0.16 | 1.93 $\pm$ 0.16 |
| Lysine               | 1.00 $\pm$ 0.07 | 0.90 $\pm$ 0.11 | 1.00 $\pm$ 0.07 | 0.15 $\pm$ 1.02 | 1.00 $\pm$ 0.15 | 1.02 $\pm$ 0.15 | 1.00 $\pm$ 0.17 | 1.11 $\pm$ 0.22 | 1.00 $\pm$ 0.17 | 0.15 $\pm$ 0.22 | 1.00 $\pm$ 0.17 | 1.11 $\pm$ 0.22 | 0.89 $\pm$ 0.13 | 1.82 $\pm$ 0.32 | 0.89 $\pm$ 0.13 | 1.82 $\pm$ 0.32 |
| Methionine           | 1.00 $\pm$ 0.36 | 0.72 $\pm$ 0.11 | 1.00 $\pm$ 0.36 | 0.08 $\pm$ 1.22 | 1.00 $\pm$ 0.12 | 1.22 $\pm$ 0.12 | 1.00 $\pm$ 0.26 | 0.85 $\pm$ 0.20 | 1.00 $\pm$ 0.26 | 0.12 $\pm$ 0.20 | 1.00 $\pm$ 0.26 | 0.85 $\pm$ 0.20 | 0.41 $\pm$ 0.03 | 4.56 $\pm$ 1.18 | 0.41 $\pm$ 0.03 | 4.56 $\pm$ 1.18 |
| Ornithine            | 1.00 $\pm$ 0.11 | 0.75 $\pm$ 0.14 | 1.00 $\pm$ 0.11 | 0.13 $\pm$ 0.87 | 1.00 $\pm$ 0.17 | 0.87 $\pm$ 0.17 | 1.00 $\pm$ 0.30 | 1.06 $\pm$ 0.30 | 1.00 $\pm$ 0.30 | 0.17 $\pm$ 0.30 | 1.00 $\pm$ 0.30 | 1.06 $\pm$ 0.30 | 0.34 $\pm$ 0.03 | 0.93 $\pm$ 0.27 | 0.34 $\pm$ 0.03 | 0.93 $\pm$ 0.27 |
| Phenylalanine        | 1.00 $\pm$ 0.09 | 0.88 $\pm$ 0.08 | 1.00 $\pm$ 0.09 | 0.09 $\pm$ 0.96 | 1.00 $\pm$ 0.10 | 0.96 $\pm$ 0.10 | 1.00 $\pm$ 0.17 | 0.88 $\pm$ 0.10 | 1.00 $\pm$ 0.17 | 0.10 $\pm$ 0.10 | 1.00 $\pm$ 0.17 | 0.88 $\pm$ 0.10 | 0.81 $\pm$ 0.07 | 1.63 $\pm$ 0.28 | 0.81 $\pm$ 0.07 | 1.63 $\pm$ 0.28 |
| Proline              | 1.00 $\pm$ 0.11 | 1.08 $\pm$ 0.03 | 1.00 $\pm$ 0.11 | 0.24 $\pm$ 0.73 | 1.00 $\pm$ 0.08 | 0.73 $\pm$ 0.08 | 1.00 $\pm$ 0.15 | 1.09 $\pm$ 0.11 | 1.00 $\pm$ 0.15 | 0.08 $\pm$ 0.11 | 1.00 $\pm$ 0.15 | 1.09 $\pm$ 0.11 | 0.59 $\pm$ 0.09 | 0.51 $\pm$ 0.05 | 0.59 $\pm$ 0.09 | 0.51 $\pm$ 0.05 |
| Serine               | 1.00 $\pm$ 0.08 | 0.93 $\pm$ 0.06 | 1.00 $\pm$ 0.08 | 0.08 $\pm$ 0.99 | 1.00 $\pm$ 0.04 | 0.99 $\pm$ 0.04 | 1.00 $\pm$ 0.05 | 0.83 $\pm$ 0.06 | 1.00 $\pm$ 0.05 | 0.04 $\pm$ 0.06 | 1.00 $\pm$ 0.05 | 0.83 $\pm$ 0.06 | 0.96 $\pm$ 0.08 | 1.09 $\pm$ 0.05 | 0.96 $\pm$ 0.08 | 1.09 $\pm$ 0.05 |
| Threonine            | 1.00 $\pm$ 0.07 | 0.86 $\pm$ 0.03 | 1.00 $\pm$ 0.07 | 0.05 $\pm$ 1.01 | 1.00 $\pm$ 0.04 | 1.01 $\pm$ 0.04 | 1.00 $\pm$ 0.05 | 0.85 $\pm$ 0.12 | 1.00 $\pm$ 0.05 | 0.04 $\pm$ 0.12 | 1.00 $\pm$ 0.05 | 0.85 $\pm$ 0.12 | 0.69 $\pm$ 0.03 | 0.88 $\pm$ 0.05 | 0.69 $\pm$ 0.03 | 0.88 $\pm$ 0.05 |
| Tryptophan           | 1.00 $\pm$ 0.04 | 1.12 $\pm$ 0.04 | 1.00 $\pm$ 0.04 | 0.05 $\pm$ 0.96 | 1.00 $\pm$ 0.02 | 0.96 $\pm$ 0.02 | 1.00 $\pm$ 0.05 | 0.99 $\pm$ 0.04 | 1.00 $\pm$ 0.05 | 0.02 $\pm$ 0.04 | 1.00 $\pm$ 0.05 | 0.99 $\pm$ 0.04 | 1.40 $\pm$ 0.06 | 1.36 $\pm$ 0.06 | 1.40 $\pm$ 0.06 | 1.36 $\pm$ 0.06 |
| Tyrosine             | 1.00 $\pm$ 0.20 | 0.91 $\pm$ 0.19 | 1.00 $\pm$ 0.20 | 0.18 $\pm$ 1.09 | 1.00 $\pm$ 0.29 | 1.09 $\pm$ 0.29 | 1.00 $\pm$ 0.27 | 1.11 $\pm$ 0.30 | 1.00 $\pm$ 0.27 | 0.29 $\pm$ 0.30 | 1.00 $\pm$ 0.27 | 1.11 $\pm$ 0.30 | 1.52 $\pm$ 0.27 | 5.40 $\pm$ 1.48 | 1.52 $\pm$ 0.27 | 5.40 $\pm$ 1.48 |
| Valine               | 1.00 $\pm$ 0.08 | 1.04 $\pm$ 0.10 | 1.00 $\pm$ 0.08 | 0.13 $\pm$ 0.88 | 1.00 $\pm$ 0.11 | 0.88 $\pm$ 0.11 | 1.00 $\pm$ 0.06 | 0.76 $\pm$ 0.11 | 1.00 $\pm$ 0.06 | 0.11 $\pm$ 0.11 | 1.00 $\pm$ 0.06 | 0.76 $\pm$ 0.11 | 0.74 $\pm$ 0.09 | 0.84 $\pm$ 0.05 | 0.74 $\pm$ 0.09 | 0.84 $\pm$ 0.05 |
| <b>Organic acids</b> |                 |                 |                 |                 |                 |                 |                 |                 |                 |                 |                 |                 |                 |                 |                 |                 |
| Citrate              | 1.00 $\pm$ 0.21 | 1.64 $\pm$ 0.49 | 1.00 $\pm$ 0.21 | 0.26 $\pm$ 0.70 | 1.00 $\pm$ 0.11 | 0.70 $\pm$ 0.11 | 1.00 $\pm$ 0.18 | 1.16 $\pm$ 0.28 | 1.00 $\pm$ 0.18 | 0.11 $\pm$ 0.28 | 1.00 $\pm$ 0.18 | 1.16 $\pm$ 0.28 | 1.08 $\pm$ 0.28 | 0.55 $\pm$ 0.10 | 1.08 $\pm$ 0.28 | 0.55 $\pm$ 0.10 |
| Fumarate             | 1.00 $\pm$ 0.11 | 1.09 $\pm$ 0.06 | 1.00 $\pm$ 0.11 | 0.06 $\pm$ 0.97 | 1.00 $\pm$ 0.23 | 0.97 $\pm$ 0.23 | 1.00 $\pm$ 0.04 | 0.93 $\pm$ 0.04 | 1.00 $\pm$ 0.04 | 0.23 $\pm$ 0.04 | 1.00 $\pm$ 0.04 | 0.93 $\pm$ 0.04 | 1.15 $\pm$ 0.07 | 1.32 $\pm$ 0.06 | 1.15 $\pm$ 0.07 | 1.32 $\pm$ 0.06 |
| Glycerate            | 1.00 $\pm$ 0.20 | 1.01 $\pm$ 0.15 | 1.00 $\pm$ 0.20 | 0.11 $\pm$ 0.86 | 1.00 $\pm$ 0.10 | 0.86 $\pm$ 0.10 | 1.00 $\pm$ 0.17 | 0.96 $\pm$ 0.08 | 1.00 $\pm$ 0.17 | 0.10 $\pm$ 0.08 | 1.00 $\pm$ 0.17 | 0.96 $\pm$ 0.08 | 0.57 $\pm$ 0.06 | 0.32 $\pm$ 0.06 | 0.57 $\pm$ 0.06 | 0.32 $\pm$ 0.06 |
| Iso-citrate          | 1.00 $\pm$ 0.07 | 0.91 $\pm$ 0.04 | 1.00 $\pm$ 0.07 | 0.08 $\pm$ 0.72 | 1.00 $\pm$ 0.11 | 0.72 $\pm$ 0.11 | 1.00 $\pm$ 0.19 | 1.31 $\pm$ 0.50 | 1.00 $\pm$ 0.19 | 0.11 $\pm$ 0.50 | 1.00 $\pm$ 0.19 | 1.31 $\pm$ 0.50 | 0.75 $\pm$ 0.06 | 1.05 $\pm$ 0.20 | 0.75 $\pm$ 0.06 | 1.05 $\pm$ 0.20 |
| Malate               | 1.00 $\pm$ 0.15 | 1.19 $\pm$ 0.20 | 1.00 $\pm$ 0.15 | 0.17 $\pm$ 0.95 | 1.00 $\pm$ 0.08 | 0.95 $\pm$ 0.08 | 1.00 $\pm$ 0.18 | 0.96 $\pm$ 0.12 | 1.00 $\pm$ 0.18 | 0.08 $\pm$ 0.12 | 1.00 $\pm$ 0.18 | 0.96 $\pm$ 0.12 | 1.99 $\pm$ 0.34 | 2.36 $\pm$ 0.42 | 1.99 $\pm$ 0.34 | 2.36 $\pm$ 0.42 |
| Phosphorate          | 1.00 $\pm$ 0.17 | 1.04 $\pm$ 0.22 | 1.00 $\pm$ 0.17 | ND              | 1.00 $\pm$ 0.15 | ND              | 1.00 $\pm$ 0.18 | 1.29 $\pm$ 0.42 | 1.00 $\pm$ 0.18 | 0.15 $\pm$ 0.42 | 1.00 $\pm$ 0.18 | 1.29 $\pm$ 0.42 | 0.42 $\pm$ 0.08 | 0.83 $\pm$ 0.15 | 0.42 $\pm$ 0.08 | 0.83 $\pm$ 0.15 |
| Succinate            | 1.00 $\pm$ 0.12 | 1.06 $\pm$ 0.12 | 1.00 $\pm$ 0.12 | 0.10 $\pm$ 1.08 | 1.00 $\pm$ 0.15 | 1.08 $\pm$ 0.15 | 1.00 $\pm$ 0.07 | 1.04 $\pm$ 0.11 | 1.00 $\pm$ 0.07 | 0.15 $\pm$ 0.11 | 1.00 $\pm$ 0.07 | 1.04 $\pm$ 0.11 | 0.93 $\pm$ 0.10 | 1.15 $\pm$ 0.08 | 0.93 $\pm$ 0.10 | 1.15 $\pm$ 0.08 |
| <b>Sugars</b>        |                 |                 |                 |                 |                 |                 |                 |                 |                 |                 |                 |                 |                 |                 |                 |                 |
| Glucose              | 1.00 $\pm$ 0.07 | 0.89 $\pm$ 0.04 | 1.00 $\pm$ 0.07 | 0.08 $\pm$ 0.73 | 1.00 $\pm$ 0.11 | 0.73 $\pm$ 0.11 | 1.00 $\pm$ 0.18 | 1.26 $\pm$ 0.46 | 1.00 $\pm$ 0.18 | 0.11 $\pm$ 0.46 | 1.00 $\pm$ 0.18 | 1.26 $\pm$ 0.46 | 0.73 $\pm$ 0.06 | 0.94 $\pm$ 0.15 | 0.73 $\pm$ 0.06 | 0.94 $\pm$ 0.15 |

|                          |      |   |      |      |   |      |      |   |      |      |   |      |      |   |      |      |   |      |      |   |      |      |   |      |
|--------------------------|------|---|------|------|---|------|------|---|------|------|---|------|------|---|------|------|---|------|------|---|------|------|---|------|
| Fructose                 | 1.00 | ± | 0.09 | 0.95 | ± | 0.10 | 1.00 | ± | 0.15 | 0.73 | ± | 0.09 | 1.00 | ± | 0.22 | 1.17 | ± | 0.47 | 0.91 | ± | 0.13 | 2.02 | ± | 0.44 |
| Fructose-6-phosphate     | 1.00 | ± | 0.15 | 0.90 | ± | 0.04 | 1.00 | ± | 0.08 | 1.16 | ± | 0.19 | 1.00 | ± | 0.06 | 1.19 | ± | 0.12 | 1.53 | ± | 0.13 | 1.64 | ± | 0.10 |
| Fucose                   | 1.00 | ± | 0.04 | 0.98 | ± | 0.03 | 1.00 | ± | 0.05 | 0.97 | ± | 0.04 | 1.00 | ± | 0.03 | 0.96 | ± | 0.05 | 0.87 | ± | 0.04 | 0.96 | ± | 0.03 |
| Maltose                  | 1.00 | ± | 0.06 | 1.08 | ± | 0.07 | 1.00 | ± | 0.08 | 1.05 | ± | 0.05 | 1.00 | ± | 0.08 | 1.01 | ± | 0.07 | 1.33 | ± | 0.11 | 0.96 | ± | 0.08 |
| Mannose                  | 1.00 | ± | 0.06 | 1.02 | ± | 0.06 | 1.00 | ± | 0.11 | 1.03 | ± | 0.11 | 1.00 | ± | 0.15 | 0.84 | ± | 0.15 | 1.30 | ± | 0.14 | 2.16 | ± | 0.32 |
| Raffinose                | 1.00 | ± | 0.10 | 0.94 | ± | 0.07 | 1.00 | ± | 0.12 | 0.89 | ± | 0.11 | 1.00 | ± | 0.14 | 1.14 | ± | 0.20 | 2.73 | ± | 0.34 | 0.93 | ± | 0.13 |
| Sucrose                  | 1.00 | ± | 0.11 | 1.00 | ± | 0.07 | 1.00 | ± | 0.09 | 0.99 | ± | 0.06 | 1.00 | ± | 0.05 | 1.02 | ± | 0.04 | 0.77 | ± | 0.07 | 0.76 | ± | 0.03 |
| Threhalose               | 1.00 | ± | 0.05 | 0.95 | ± | 0.03 | 1.00 | ± | 0.09 | 0.97 | ± | 0.03 | 1.00 | ± | 0.04 | 0.95 | ± | 0.07 | 0.85 | ± | 0.07 | 0.59 | ± | 0.02 |
| Xylose                   | 1.00 | ± | 0.07 | 0.87 | ± | 0.08 | 1.00 | ± | 0.08 | 0.91 | ± | 0.14 | 1.00 | ± | 0.03 | 0.98 | ± | 0.09 | 0.94 | ± | 0.03 | 1.05 | ± | 0.01 |
| <b>Sugar alcohols</b>    |      |   |      |      |   |      |      |   |      |      |   |      |      |   |      |      |   |      |      |   |      |      |   |      |
| Erythritol               | 1.00 | ± | 0.06 | 0.93 | ± | 0.03 | 1.00 | ± | 0.03 | 0.88 | ± | 0.04 | 1.00 | ± | 0.10 | 0.93 | ± | 0.04 | 0.52 | ± | 0.01 | 0.33 | ± | 0.03 |
| Galactinol               | 1.00 | ± | 0.10 | 1.06 | ± | 0.19 | 1.00 | ± | 0.10 | 1.00 | ± | 0.13 | 1.00 | ± | 0.16 | 1.30 | ± | 0.21 | 2.12 | ± | 0.22 | 2.61 | ± | 0.40 |
| <b>Other metabolites</b> |      |   |      |      |   |      |      |   |      |      |   |      |      |   |      |      |   |      |      |   |      |      |   |      |
| Spermidine               | 1.00 | ± | 0.04 | 0.86 | ± | 0.05 | 1.00 | ± | 0.15 | 1.13 | ± | 0.06 | 1.00 | ± | 0.13 | 1.03 | ± | 0.08 | 0.54 | ± | 0.08 | 0.62 | ± | 0.08 |
| Urea                     | 1.00 | ± | 0.17 | 0.87 | ± | 0.05 | 1.00 | ± | 0.18 | 0.98 | ± | 0.11 | 1.00 | ± | 0.23 | 0.75 | ± | 0.09 | 1.10 | ± | 0.20 | 1.52 | ± | 0.35 |

**Supplemental table 3. Primers used in this study.**

| Map Based Cloning | Forward                                        | Reverse                                            | Product |
|-------------------|------------------------------------------------|----------------------------------------------------|---------|
| K6A12-23K         | GGATTTGTTAACTTGAGATATCTTATGGTTTTAGT            | TGGGAGACC AAAATACGTTACAAAATG                       | 329     |
| MXI22-12K         | ACGTATGTGATCTTAGTAAACC AAAATAAAGTG             | TAGCCAGAATGGATGACTTGGG                             | 357     |
| Y2H               |                                                |                                                    |         |
| QS/OLD5           | GAATTC <u>CCCGGGGATGGCGTTAGCTCTCTCCGTC</u>     | ATCATCG <u>ICGACGTCATCTCTTGCTCTCACAACT</u>         | 2182    |
| SufE              | GAATTC <u>CCCGGGGATGGCAGCAGCGATGCTCTTCTTCT</u> | ATCATCG <u>ICGACGTC AAAACCTCAGCAGGAGTCTTTGC</u>    | 1141    |
| CpNifS1           | GAATTC <u>CCCGGGGATGGAAGGTGGCTATGAAACTC</u>    | ATCATCG <u>ICGACGTTATTTGAAAGAGTTGAAGAAGCT</u>      | 1417    |
| CpNifS2           | GAATTC <u>CCCGGGGATGTTGCGAGATTGTTCAAGGCAG</u>  | ATCATCG <u>ICGACGCTAGACTCTGATAGTTGGACCAGT</u>      | 874     |
| AO                | GAATTC <u>CCCGGGGATGGCGGCTCATGTTTCTACTGGA</u>  | ATCATCG <u>ICGACGTTAGCAATCAATAAGTGAGCTGCT</u>      | 1981    |
| CpNifS3           | GAATTC <u>CCCGGGGATGGCGTCTCTATCTCCACCCGGA</u>  | ATCATCG <u>ICGACGTC AACCAAGATAGAGACCGTGCATTTGA</u> | 1453    |
| Real Time PCR     |                                                |                                                    |         |
| ACT2              | TCTCCGCTTTGAATTGTCTC                           | TATGAGCTTGGAAAAGAAAGAGC                            | 185     |
| QS/OLD5           | TCATGAGCTTGTACCTACCA                           | GGTTCCTTCCTGGAAAATAGTG                             | 249     |
| SAG12             | TATTACAGGTTATGAGGATGTCCC                       | ACCACATAGTCCTTGTTTATCC                             | 300     |
| SAG13             | GAACTCAAAGATGGAGTCTTGG                         | ATTGTTGACGAGGATGTTGAG                              | 279     |
| QPRT              | AAATGGATGTAGAGGTGGAGAC                         | TCTGTCCGATCTTGTGTA CTG                             | 236     |
| GDH2              | GCAACA AACAGAACTTCCGT                          | TCGTACACTCAACCTTGATTTCTC                           | 105     |
| NaPRT2            | CATACGATGTGATGAAGAGTGG                         | CATTACTAGCAGTGACGACC                               | 203     |
| AO                | TGAAGAAACCGTAAGAGTTGTG                         | CAAGCCATCCTGAGAAGTGAG                              | 267     |
| NaPRT1            | CATTAACGGACCCACTAACCC                          | ACAGATCAAACACAGATCGCTC                             | 118     |
| NADS              | AAGGTATAAGGTTGATGGAGGA                         | CTATGAACCCCAAGGCAAGAG                              | 116     |
| DEFL              | CTTAGTCATTTCCGATGTGCC                          | GCATCTTCCACCCTTTAGCTC                              | 159     |
| OxiReductase      | TGATATCTGCAGGAATGAAAACG                        | GGGTAGTAGTTAAGGTTGACTC                             | 161     |
| NIC1              | GATCAGCTAAAGAAGCAGATTCC                        | TTTGTGGAGCCATATTGCC                                | 136     |
